# Supplementary material
Source: Springer Nature journal article supplement (https://www.springermedizin.de/resource/supplementary/12939_2012_353_MOESM2_ESM.pdf/9550958)
Supplement: MOESM2 [file 9550958]

|         |                                                |                  |            |                                                  |                             |                  |                         |
|---------|------------------------------------------------|------------------|------------|--------------------------------------------------|-----------------------------|------------------|-------------------------|
| Level 1 | <b>Region</b>                                  |                  | <b>Sex</b> |                                                  | <b>Child's age (months)</b> |                  | Distal<br>↓<br>Proximal |
|         | North                                          | 1.82 (1.20-2.76) | Male       | 1.00 (reference)                                 | 0-5                         | 1.00 (reference) |                         |
|         | Central-West                                   | 1.23 (0.78-1.96) | Female     | 0.90 (0.81-0.99)                                 | 6-11                        | 1.61 (1.15-2.26) |                         |
|         | Northeast                                      | 0.61 (0.38-0.99) |            |                                                  | 12-23                       | 3.42 (2.58-4.53) |                         |
|         | Southeast/South                                | 1.00 (reference) |            |                                                  | 24-35                       | 3.58 (2.65-4.83) |                         |
|         |                                                |                  |            | 36-47                                            | 3.18 (2.30-4.39)            |                  |                         |
|         |                                                |                  |            | 48-59                                            | 2.77 (1.95-3.93)            |                  |                         |
| Level 2 | <b>Household good index</b>                    |                  |            | <b>Maternal schooling (years)</b>                |                             |                  |                         |
|         | 1st tertile                                    | 1.48 (1.21-1.79) | 0          | 3.03 (2.22-4.14)                                 |                             |                  |                         |
|         | 2nd tertile                                    | 1.32 (1.13-1.54) | 1-4        | 2.44 (1.87-3.20)                                 |                             |                  |                         |
|         | 3rd tertile                                    | 1.00 (reference) | 5-9        | 1.65 (1.30-2.09)                                 |                             |                  |                         |
|         |                                                |                  | ≥ 10       | 1.00 (reference)                                 |                             |                  |                         |
| Level 3 | <b>Trash collection service in the village</b> |                  |            |                                                  |                             |                  |                         |
|         | Yes                                            | 1.00 (reference) |            | No                                               | 1.35 (0.91-2.02)            |                  |                         |
| Level 4 | <b>Maternal anemia</b>                         |                  |            | <b>Maternal age (years)</b>                      |                             |                  |                         |
|         | No                                             | 1.00 (reference) |            | < 20                                             | 1.00 (reference)            |                  |                         |
|         | Moderate                                       | 1.11 (0.99-1.25) |            | 20-29                                            | 0.84 (0.73-0.96)            |                  |                         |
|         | Severe                                         | 1.63 (1.27-2.10) |            | 30-39                                            | 0.72 (0.60-0.86)            |                  |                         |
|         |                                                |                  | ≥ 40       | 0.75 (0.62-0.92)                                 |                             |                  |                         |
| Level 5 | <b>Birthweight (grams)</b>                     |                  |            | <b>Child hospitalized during prior 12 months</b> |                             |                  |                         |
|         | < 2500                                         | 2.87 (2.24-3.66) |            | No                                               | 1.00 (reference)            |                  |                         |
|         | 2500-2999                                      | 2.11 (1.73-2.58) |            | Yes                                              | 1.20 (1.03-1.41)            |                  |                         |
|         | 3000-3499                                      | 1.34 (1.06-1.70) |            |                                                  |                             |                  |                         |
|         | ≥ 3500                                         | 1.00 (reference) |            |                                                  |                             |                  |                         |
